# Supplementary material for: Structural Basis for Native Agonist and Synthetic Inhibitor Recognition by the Pseudomonas aeruginosa Quorum Sensing Regulator PqsR (MvfR)
Source: PubMed Central journal article supplement (PMC3723537; doi:10.1371/journal.ppat.1003508), 2013-07-25
Supplement: ppat.1003508.s001.pdf [file ppat.1003508.s001.pdf]

Supplementary Figure S1

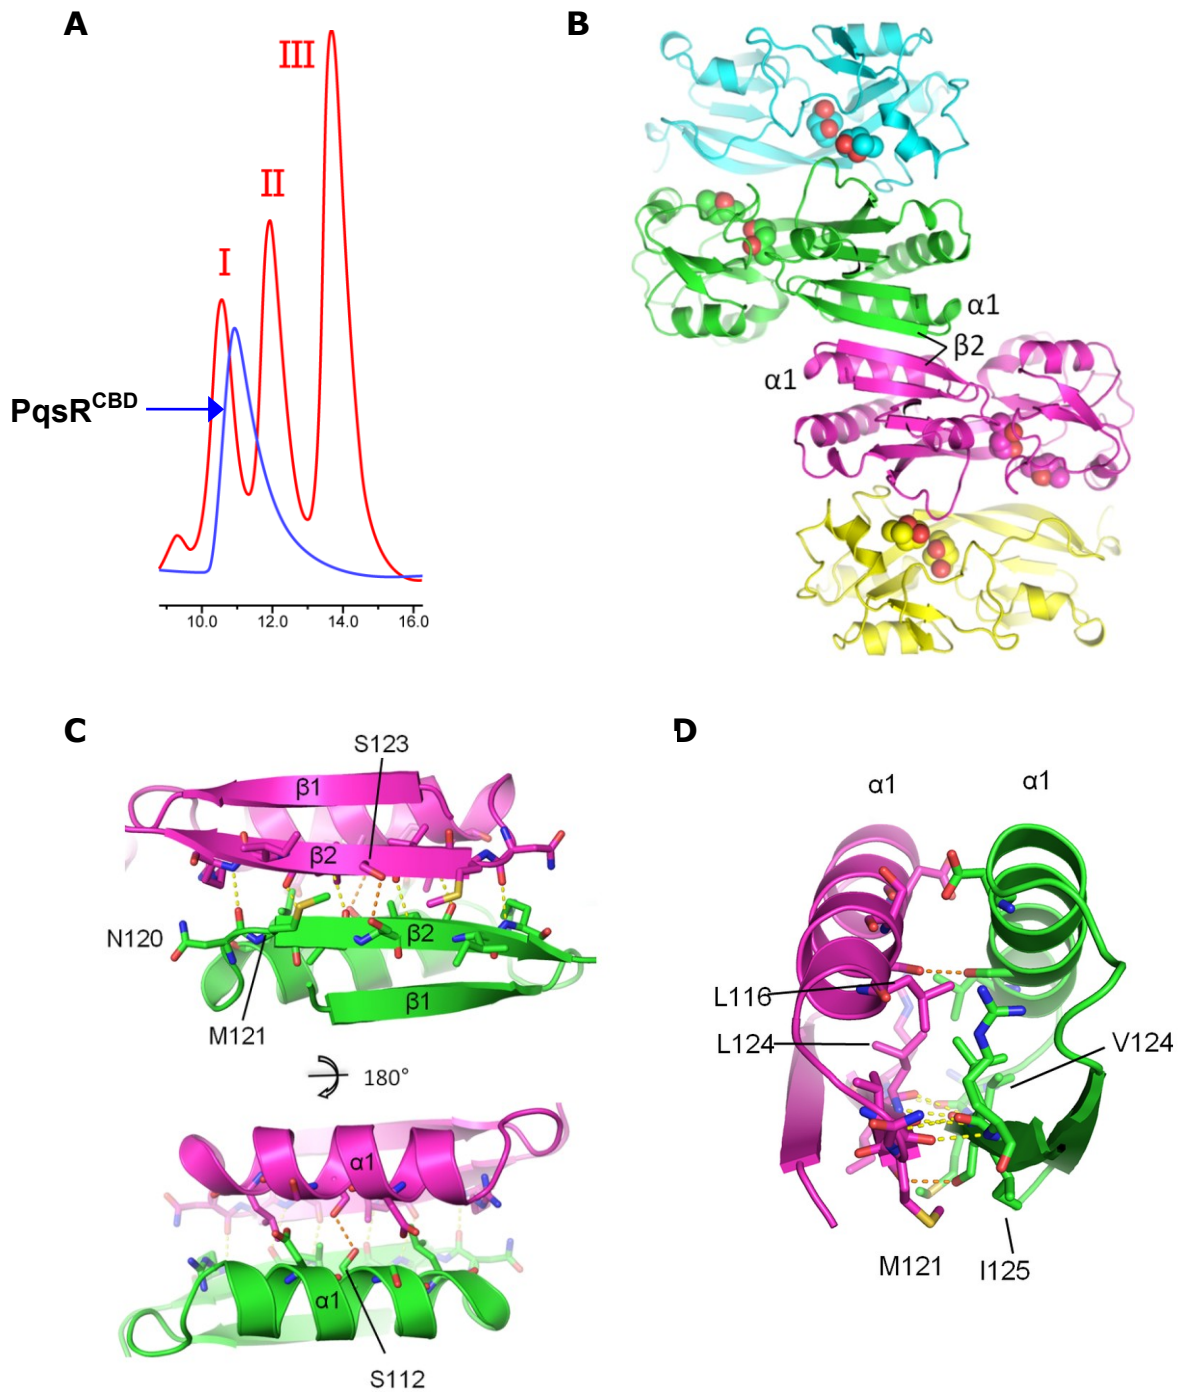

**Figure S1.** (A) Gel filtration chromatogram of PqsR<sup>CBD</sup> (residues 94-332). Absorbance elution profiles are shown PqsR<sup>CBD</sup> in blue overlapped with the elution profiles of protein standards (red) using a Superdex 75 10/300 analytical column. The standards include I - ovalbumin (43 kDa), II - carbonic anhydrase (29 kDa) and III - ribonuclease A (13.7 kDa). (B) The PqsR<sup>CBD</sup> tetrameric arrangement observed in the crystal structure shown as topology with MPD shown as spheres. (C) A close up view of the PqsR<sup>CBD</sup> tetramer interface shown as topology. Two views are shown related by a 180 degree rotation with hydrogen bonding interactions highlighted as dotted lines (orange) and key residues shown in stick. (D) End view of the interface shown in (C).
