# Supplementary material for: Structural Basis for Native Agonist and Synthetic Inhibitor Recognition by the Pseudomonas aeruginosa Quorum Sensing Regulator PqsR (MvfR)
Source: PubMed Central journal article supplement (PMC3723537; doi:10.1371/journal.ppat.1003508), 2013-07-25
Supplement: ppat.1003508.s003.pdf [file ppat.1003508.s003.pdf]

**Supplementary Figure S3**

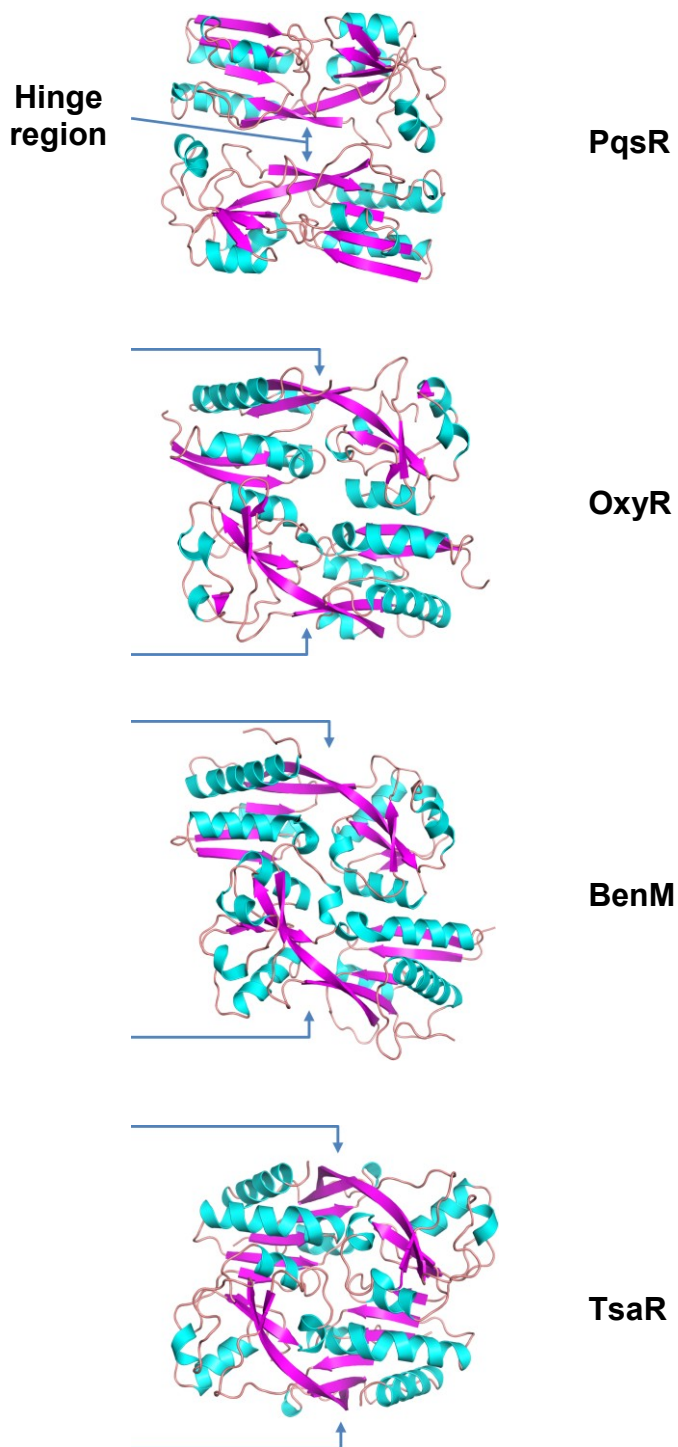

**Figure S3.** Unique dimer organisation of PqsR. Cartoon diagrams of the central dimer organisation for LTTRs PqsR, OxyR (pdb: 1I69), BenM (pdb: 2F78) and TsaR (pdb: 3FXQ).  $\beta$ -strands are colored magenta and  $\alpha$ -helices in cyan.  $\beta$ -strands involved in the hinge region are indicated by a blue arrow showing the centrally located hinge regions in PqsR compared to the peripheral location of hinge regions on OxyR, BenM and TsaR.
