# Supplementary material for: Structural Basis for Native Agonist and Synthetic Inhibitor Recognition by the Pseudomonas aeruginosa Quorum Sensing Regulator PqsR (MvfR)
Source: PubMed Central journal article supplement (PMC3723537; doi:10.1371/journal.ppat.1003508), 2013-07-25
Supplement: ppat.1003508.s004.pdf [file ppat.1003508.s004.pdf]

**Supplementary Table S1. Strains and plasmids used in this study**

| Strains/Plasmids                               | Relevant Characteristics                                                                                                                             | Source/Reference      |
|------------------------------------------------|------------------------------------------------------------------------------------------------------------------------------------------------------|-----------------------|
| <b><i>E. coli</i></b>                          |                                                                                                                                                      |                       |
| Novablue                                       | <i>gyrA96 relA1 lac F' [proA+B+ lacIqZΔM15::Tn10]</i> (Tet <sup>R</sup> )                                                                            | EMD4Biosciences       |
| Rosetta 2 (DE3)                                | <i>F-ompT hsdSB(rB- mB-) gal dcm</i> (DE3) pRARE (Cm <sup>R</sup> )                                                                                  | EMD4Biosciences       |
| B834 (DE3) pLysS                               | <i>F-ompT hsdSB(rB- mB-) gal dcm met</i> (DE3) pLysS                                                                                                 | EMD4Biosciences       |
| S17-1λpir                                      | Conjugative strain for suicide plasmids                                                                                                              | [1]                   |
| SM10λpir                                       | Conjugative strain for suicide plasmids                                                                                                              | [1]                   |
| <b><i>P. aeruginosa</i></b>                    |                                                                                                                                                      |                       |
| PAO1                                           | wild-type <i>P. aeruginosa</i> strain, parent of the strains below                                                                                   | Laboratory collection |
| PAO1 CTX:: <i>pqsA'-lux</i>                    | PAO1 with a miniCTX:: <i>pqsA'-luxCDABE</i> fusion integrated in the chromosomal CTX attachment site                                                 | [2]                   |
| PAO1 Δ <i>pqsA</i>                             | <i>pqsA</i> in-frame deletion mutant; AQ-negative                                                                                                    | [2]                   |
| PAO1 Δ <i>pqsA</i> CTX:: <i>pqsA'-lux</i>      | <i>pqsA</i> in-frame deletion mutant with a miniCTX:: <i>pqsA'-luxCDABE</i> fusion integrated in the chromosome                                      | [3]                   |
| PAO1 Δ <i>pqsAH</i><br>CTX:: <i>pqsA'-lux</i>  | double Δ <i>pqsA</i> Δ <i>pqsH</i> in-frame deletion mutant with a miniCTX:: <i>pqsA'-luxCDABE</i> chromosomal fusion                                | [2]                   |
| PAO1 Δ <i>pqsR</i>                             | Δ <i>pqsR</i> in-frame deletion mutant                                                                                                               | This study            |
| PAO1 Δ <i>pqsAHR</i>                           | triple Δ <i>pqsA</i> Δ <i>pqsH</i> Δ <i>pqsR</i> in-frame deletion mutant                                                                            | This study            |
| PAO1 Δ <i>pqsR</i> CTX:: <i>pqsA'-lux</i>      | Δ <i>pqsR</i> deletion mutant with a miniCTX:: <i>pqsA'-luxCDABE</i> chromosomal fusion                                                              | This Study            |
| PAO1 Δ <i>pqsAHR</i><br>CTX:: <i>pqsA'-lux</i> | triple Δ <i>pqsA</i> Δ <i>pqsH</i> Δ <i>pqsR</i> in-frame deletion mutant with a miniCTX:: <i>pqsA'-luxCDABE</i> chromosomal fusion                  | This Study            |
| PAO1 <i>lecA::lux</i>                          | <i>lecA::luxCDABE</i> chromosomal reporter fusion                                                                                                    | [4]                   |
| PAO1 CTX:: <i>phzA1'-lux</i>                   | PAO1 with a miniCTX:: <i>phzA1'-luxCDABE</i> fusion integrated in the chromosomal CTX attachment site                                                | This study            |
| <b>Plasmids</b>                                |                                                                                                                                                      |                       |
| pBluescript II KS+<br>pFLP2                    | Cloning vector; ColE1 replicon; Ap <sup>R</sup>                                                                                                      | Stratagene            |
| miniCTX- <i>lux</i>                            | Plasmid providing Flp recombinase; Ap <sup>R</sup>                                                                                                   | [5]                   |
|                                                | pHKBS1 reporter vector for the insertion of promoter- <i>luxCDABE</i> fusions into the CTX attachment site of <i>P. aeruginosa</i> ; Tc <sup>R</sup> | [6]                   |
| pCTX:: <i>pqsA'-lux</i>                        | Promoter region and part of <i>pqsA</i> fused to <i>luxCDABE</i> inserted into the miniCTX-1 delivery plasmid. Tc <sup>R</sup>                       | [2]                   |
| CTX:: <i>phzA1-lux</i>                         | Promoter region and part of <i>phzA1</i> fused to <i>luxCDABE</i> inserted into the miniCTX-1 delivery plasmid. Tc <sup>R</sup>                      | This Study            |
| pET28a                                         | Expression vector for <i>E. coli</i> , Km <sup>R</sup>                                                                                               | Novagen               |
| pPqsR-C <sup>94-332</sup>                      | pET28a containing the PqsR CBD region, residues 94-332; Km <sup>R</sup>                                                                              | This study            |
| pPqsR-C <sup>94-294</sup>                      | pET28a containing the PqsR CBD region, residues 94-294; Km <sup>R</sup>                                                                              | This study            |
| pBS <i>pqsRU</i> p                             | pBluescript II KS+ carrying the upstream region of <i>pqsR</i> ; Ap <sup>R</sup>                                                                     | This study            |
| pBS <i>pqsRDown</i>                            | pBluescript-II KS+ carrying the downstream region of <i>pqsR</i> ; Ap <sup>R</sup>                                                                   | This study            |
| pDM4Δ <i>pqsR</i>                              | pDM4 derivative for the in-frame deletion of <i>pqsR</i> ; Cm <sup>R</sup>                                                                           | This study            |
| pME6032                                        | pVS1-p15A shuttle expression (IPTG-inducible) vector, Tc <sup>R</sup>                                                                                | [7]                   |
| pPqsR                                          | pME6032 derivative expressing native <i>pqsR</i> ; Tc <sup>R</sup>                                                                                   | This Study            |
| pPqsR-6His                                     | pME6032 derivative expressing <i>pqsR</i> -6His; Tc <sup>R</sup>                                                                                     | This Study            |
| pPqsR-6His-I149A                               | derivative of pPqsR-6His with I149A substitution; Tc <sup>R</sup>                                                                                    | This Study            |
| pPqsR-6His-I149E                               | derivative of pPqsR-6His with I149E substitution; Tc <sup>R</sup>                                                                                    | This Study            |
| pPqsR-6His-A168F                               | derivative of pPqsR-6His with A168F substitution; Tc <sup>R</sup>                                                                                    | This Study            |
| pPqsR-6His-I186A                               | derivative of pPqsR-6His with I186A substitution; Tc <sup>R</sup>                                                                                    | This Study            |
| pPqsR-6His-Q194E                               | derivative of pPqsR-6His with Q194E substitution; Tc <sup>R</sup>                                                                                    | This Study            |
| pPqsR-6His-L207A                               | derivative of pPqsR-6His with L207A substitution; Tc <sup>R</sup>                                                                                    | This Study            |
| pPqsR-6His-L207E                               | derivative of pPqsR-6His with L207E substitution; Tc <sup>R</sup>                                                                                    | This Study            |
| pPqsR-6His-F221A                               | derivative of pPqsR-6His with F221A substitution; Tc <sup>R</sup>                                                                                    | This Study            |
| pPqsR-6His-F221E                               | derivative of pPqsR-6His with F221E substitution; Tc <sup>R</sup>                                                                                    | This Study            |
| pPqsR-6His-F221Y                               | derivative of pPqsR-6His with F221Y substitution; Tc <sup>R</sup>                                                                                    | This Study            |
| pPqsR-6His-I236F                               | derivative of pPqsR-6His with I236F substitution; Tc <sup>R</sup>                                                                                    | This Study            |
| pPqsR-6His-Y258A                               | derivative of pPqsR-6His with Y258A substitution; Tc <sup>R</sup>                                                                                    | This Study            |
| pPqsR-6His-I263W                               | derivative of pPqsR-6His with I263W substitution; Tc <sup>R</sup>                                                                                    | This Study            |

**References for Table S1**

1. Simon R, Priefer U, Puhler A (1983) A broad host range mobilization system for *in vivo* genetic engineering, transposon mutagenesis in Gram-negative bacteria. *Bio-Technol* 1: 784-791.
2. Fletcher MP, Diggle SP, Crusz SA, Chhabra SR, Camara M, et al. (2007) A dual biosensor for 2-alkyl-4-quinolone quorum-sensing signal molecules. *Environ Microbiol* 9: 2683-2693.
3. Diggle SP, Matthijs S, Wright VJ, Fletcher MP, Chhabra SR, et al. (2007) The *Pseudomonas aeruginosa* 4-quinolone signal molecules HHQ and PQS play multifunctional roles in quorum sensing and iron entrapment. *Chem Biol* 14: 87-96.
4. Winzer K, Falconer C, Garber NC, Diggle SP, Camara M, et al. (2000) The *Pseudomonas aeruginosa* lectins PA-IL and PA-IIL are controlled by quorum sensing and by RpoS. *J Bacteriol* 182: 6401-6411.
5. Hoang TT, Karkhoff-Schweizer RR, Kutchma AJ, Schweizer HP (1998) A broad-host-range Flp-FRT recombination system for site-specific excision of chromosomally-located DNA sequences: application for isolation of unmarked *Pseudomonas aeruginosa* mutants. *Gene* 212: 77-86.
6. Becher A, Schweizer HP (2000) Integration-proficient *Pseudomonas aeruginosa* vectors for isolation of single-copy chromosomal *lacZ* and *lux* gene fusions. *Biotechniques* 29: 948-952.
7. Heeb S, Blumer C, Haas D (2002) Regulatory RNA as mediator in GacA/RsmA-dependent global control of exoproduct formation in *Pseudomonas fluorescens* CHA0. *J Bacteriol* 184: 1046-1056.
