# Supplementary material for: Structural Basis for Native Agonist and Synthetic Inhibitor Recognition by the Pseudomonas aeruginosa Quorum Sensing Regulator PqsR (MvfR)
Source: PubMed Central journal article supplement (PMC3723537; doi:10.1371/journal.ppat.1003508), 2013-07-25
Supplement: ppat.1003508.s005.pdf [file ppat.1003508.s005.pdf]

**Supplementary Table S2.** Oligonucleotides used in this study

| Primer                  | Sequence <sup>a</sup>                                 | Restriction site <sup>b</sup> |
|-------------------------|-------------------------------------------------------|-------------------------------|
| <i>pqsRC94F</i>         | 5'- <u>TGCTAGCAAT</u> CTCCGGGTGCTGCT-3'               | NheI                          |
| <i>pqsRC332R</i>        | 5'-GATA <u>AAGCTT</u> TTCACTCTGGTGC GGCGC-3'          | HindIII                       |
| <i>pqsRC309R</i>        | 5'-CGATA <u>AAGCTT</u> TCAGCTCGGTTGCCAGGC-3'          | HindIII                       |
| <i>pqsRC296R</i>        | 5'-CGATA <u>AAGCTT</u> TCAGCCGAGTTCGCGCAG-3'          | HindIII                       |
| FW <i>pqsRU</i> p       | 5'-ATA <u>AAGCTT</u> TCTTAGAACCGTTCCTGG-3'            | HindIII                       |
| RV <i>pqsRU</i> p       | 5'-ATAGGATCCAGGTTATGAATAGGCATC-3'                     | BamHI                         |
| FW <i>pqsR</i> Down     | 5'-ATAGGATCCAGAGTAGAGCGTTCTCCA-3'                     | BamHI                         |
| RV <i>pqsR</i> Down     | 5'-ATATCTAGAAGTTCTGCCTGCTCGGCG-3'                     | XbaI                          |
| FW <i>pqsR</i>          | 5'-TATGAATTCATGCCTATTCATAACCTGAATCA-3'                | EcoRI                         |
| RV <i>pqsR</i>          | 5'-TATGAGCTCCTACTCTGGTGC GGCGCG-3'                    | SacI                          |
| RV <i>pqsR-6H</i>       | 5'-TATGAGCTCCTAGTGATGGTGTGGTGTGCTCTGGTGC GGCGCGCTG-3' | SacI                          |
| FW <i>pqsR-6H</i> I149A | 5'-ATCGCCATCACC <b>GCC</b> GACGAGGAACTG-3'            | -                             |
| RV <i>pqsR-6H</i> I149A | 5'-CAGTTCCTCGTC <b>GCC</b> GGTGATGGCGAT-3'            | -                             |
| FW <i>pqsR-6H</i> I149E | 5'-ATCGCCATCACC <b>GAG</b> GACGAGGAACTG-3'            | -                             |
| RV <i>pqsR-6H</i> I149E | 5'-CAGTTCCTCGTC <b>CTC</b> GGTGATGGCGAT-3'            | -                             |
| FW <i>pqsR-6H</i> A168F | 5'-GGCTACACCAAG <b>TT</b> CTTCGTCGTCGCC-3'            | -                             |
| RV <i>pqsR-6H</i> A168F | 5'-GGCGACGACGA <b>AA</b> ACTTGGTGTAGCC-3'             | -                             |
| FW <i>pqsR-6H</i> I186A | 5'-CCCTGCACAG <b>CGCC</b> GCGAGCCTGGC-3'              | -                             |
| RV <i>pqsR-6H</i> I186A | 5'-GCCAGGCTCG <b>GGC</b> CTGTGCAGGG-3'                | -                             |
| FW <i>pqsR-6H</i> Q194E | 5'-GCCAATTACCG <b>GAG</b> ATCAGCCTCGG-3'              | -                             |
| RV <i>pqsR-6H</i> Q194E | 5'-CCGAGGCTGAT <b>CTC</b> CCGGTAATTGGC-3'             | -                             |
| FW <i>pqsR-6H</i> L207A | 5'-CAGCATTGAA <b>CGCC</b> CTGCGGCCGGTC-3'             | -                             |
| RV <i>pqsR-6H</i> L207A | 5'-GACCGGCCCGAG <b>GGC</b> GTTTCAATGCTG-3'            | -                             |
| FW <i>pqsR-6H</i> L207E | 5'-CAGCATTGAA <b>CGAG</b> CTGCGGCCGGTC-3'             | -                             |
| RV <i>pqsR-6H</i> L207E | 5'-ACCGGCCCGAG <b>CTC</b> GTTTCAATGCTG-3'             | -                             |
| FW <i>pqsR-6H</i> F221A | 5'-TTCGTGGAAAAC <b>GCC</b> GACGACATGCTG-3'            | -                             |
| RV <i>pqsR-6H</i> F221A | 5'-CAGCATGTCGTC <b>GGC</b> GTTTTCCACGAA-3'            | -                             |
| FW <i>pqsR-6H</i> F221E | 5'-TTCGTGGAAAAC <b>GAG</b> GACGACATGCTG-3'            | -                             |
| RV <i>pqsR-6H</i> F221E | 5'-CAGCATGTCGTC <b>CTC</b> GTTTTCCACGAA-3'            | -                             |
| FW <i>pqsR-6H</i> F221Y | 5'-TTCGTGGAAAAC <b>TAC</b> GACGACATGCTG-3'            | -                             |
| RV <i>pqsR-6H</i> F221Y | 5'-CAGCATGTCGTC <b>GTAG</b> TTTTTCCACGAA-3'           | -                             |
| FW <i>pqsR-6H</i> I236F | 5'-TCGGATGGGG <b>CTC</b> GCGCCGATTAT-3'               | -                             |
| RV <i>pqsR-6H</i> I236F | 5'-ATAATGCGGCG <b>GAAG</b> CCCCATCCGA-3'              | -                             |
| FW <i>pqsR-6H</i> Y258A | 5'-CTCAGCGAACT <b>CGCC</b> GAACCGGGCGG-3'             | -                             |
| RV <i>pqsR-6H</i> Y258A | 5'-CCGCCCGGTT <b>CGGC</b> GAGTTCGCTGAG-3'             | -                             |
| FW <i>pqsR-6H</i> I263W | 5'-GAACCGGGCGGCT <b>TGG</b> GACACCAAGGTG-3'           | -                             |
| RV <i>pqsR-6H</i> I263W | 5'-CACCTTGGTGT <b>CCAG</b> CCCGCCGGTTC-3'             | -                             |

<sup>a</sup> added restriction sites are underlined; substituted codons are in bold

<sup>b</sup> -, no restriction site added
